# Supplementary material
Source: publisher figshare collection journal article supplement (https://springernature.figshare.com/ndownloader/files/12380966)
Supplement: Supplementary file 1 [file 12380966]

	Lebanon، Beirut	Lebanon، Baalbek	Lebanon، El Hermel	Lebanon، Rachaya	Lebanon، West Bekaa	Lebanon، Zahle	Lebanon، Aley	Lebanon، Baabda	Lebanon، Chouf	Lebanon، El Meten	Lebanon، Jbeil	Lebanon، Kesrwane	Lebanon، Akkar	Lebanon، Bcharre	Lebanon، El Batroun	Lebanon، El Koura	LEB-North El Minieh-Dennie	Lebanon، Tripoli	Lebanon، Zgharta	Lebanon، Bent Jbeil	Lebanon، El Nabatieh	Lebanon، Hasbaya	Lebanon، Jezzine	Lebanon، Marjaayoun	Lebanon، Saida	Lebanon، Sour
Syria، Aleppo	60.3727272852737	77.235204167006	94.1827408137176	60.6785524016732	62.6386460458974	67.9498921511055	61.0884233055903	59.8875884428031	59.8252793696488	61.3634827424093	67.6746174521593	63.6156931305791	91.4787699889388	67.2192810892771	71.1021064080327	75.3307246693734	85.7957659572464	81.1866531049449	78.191839120692	53.0520820889963	52.4449698902839	60.5737824312076	59.3053938557132	60.4305495786139	58.3432918785159	50.8391376102709
Syria، Al-hasakeh	35.4509825454224	43.8109461573808	48.8752708456855	37.3694622598014	37.837977986037	38.0185481075167	36.3503741336285	35.8585736500886	35.7318476551114	35.8064210827151	37.7077086761285	36.6030811296686	44.7685812828257	39.6525725203624	39.1335136606064	40.7207105980305	43.4844944429002	42.3139622857874	41.509398459357	33.5272280934487	34.0862076707899	35.9107281080101	34.9000002653228	35.3996606366857	33.6484318713307	32.6643938805004
Syria، Ar-raqqa	77.4022235041391	85.5581081478427	96.2595440261704	80.2865064531239	79.9236790694308	79.6409448198102	80.3203994778123	76.1009779657526	79.9142594772459	78.947167964329	78.9612694518037	80.1529008560779	87.8689577733263	79.1569132233206	79.5182244817398	82.5908640198171	85.5616621327677	85.4450146445342	84.4289279724728	64.6541780483168	60.8649540917715	75.6768497801988	71.7247590933326	73.5433157826133	67.0812354876871	59.313856322389
Syria، As-sweida	185.114863582172	210.363095014327	113.151381640961	260.54172356031	283.23693373736	287.483832761429	219.036745098957	203.448525335948	199.271630582258	187.586805222524	148.56383001738	167.529002797083	93.6356431885509	135.280878921656	134.118978051579	116.270095417769	90.3845648580493	113.382866222226	108.808316442507	139.98566638727	160.594368735973	204.719859291381	178.215805847708	190.243765335247	143.849997363829	114.509822396156
Syria، Damascus	958.797566033966	1449.52992130401	369.221902005148	3247.13782291944	5072.23544379111	5625.93617352398	1642.4797566717	1291.09323477235	1210.60642038174	996.785856485133	589.868678789785	759.405416840887	225.980901671843	501.386934764587	493.056580990691	414.600770911247	203.956710184728	396.777300618971	365.691636420516	529.273514687739	694.611350431357	1323.07181002839	869.994268032653	1040.03827565718	553.353357406854	404.439425405648
Syria، Dar'a	158.99729632901	178.35534300898	123.461639345901	211.239210979944	226.409274602955	229.797367584008	184.613179896292	173.739588911427	170.738417840698	160.994962645445	131.365317326035	145.444903938706	84.7411174738426	120.506237464922	119.158860732274	103.347969592478	80.2948027763038	101.254110225339	97.3296575574436	125.146537246777	139.909392477607	174.247571988544	153.614469558009	162.993725241877	128.390624433781	102.422714900977
Syria، Deir-ez-zor	61.1983336419796	96.549448671163	119.157035727917	70.1857448976943	72.5954739076442	73.161482440874	65.1543538366187	63.0901361656934	62.4088549412025	62.7991398188948	71.927796562569	66.4737263203632	101.366403871386	79.0229324313997	77.2042833757449	83.045856265897	95.0259671662302	89.7097906478971	86.4338831232358	51.7389627695563	55.9019784471531	63.2545653137989	59.0033803998686	60.9767625162873	52.591502002488	47.2179445720598
Syria، Hama	150.594850813186	283.111111638697	399.618332431321	151.371391144638	166.440187419187	204.484509757395	154.45426740872	145.391687635356	145.136527375944	156.252219156183	202.91420783544	172.916586749523	367.180853877821	199.875423515779	232.87077635676	270.101484270907	313.401701365381	308.060046171022	290.831259073176	98.9722493940482	97.4148177477046	132.303164646389	120.453398654972	125.820759311012	116.392807180402	95.6170161887998
Syria، Homs	268.249363774042	783.926031632545	1710.54997967218	295.751273678327	349.275264252981	479.818722600198	305.676165086141	259.340745664873	278.477722985295	279.571983931393	412.301810850711	320.870251375705	1181.52377682671	402.924963440926	499.461634752451	614.74277780377	935.661636013465	773.759774059225	684.625969864251	163.577599666988	146.277903265401	247.485200972739	215.609895646451	230.219078617335	185.748499523357	137.824042587123
Syria، Idleb	74.1235354888071	102.660132302172	127.530908002889	75.2544173131378	79.0571297311442	85.5410617219632	70.2345688188383	72.6403871948703	73.1210096750015	75.8847976460707	84.5681470959164	79.7456654898568	123.435706345678	83.9651972132927	90.390918172388	98.3038796844033	114.684474042808	107.374921029822	102.926665403512	60.5189632856372	59.050204264236	68.4850185948579	60.0595368476971	66.3972138650674	65.4410026040848	56.9746752340724
Syria، Lattakia	131.856272195955	100.320099285331	127.767343636992	72.5831167901868	91.7063106412536	85.9685403822607	120.143280779037	127.716863511695	101.266315694857	137.473276396404	160.681165583787	148.702714169497	180.926610945129	160.77816087237	156.800421139135	175.175790747023	182.250587167129	168.949137025898	181.847300147619	72.985174462318	87.4637837704096	74.2521452757826	88.9169114902135	78.9584353685785	99.8593050214205	84.3008449808034
Syria، Quneitra	299.705833879613	347.594702984201	212.195860802618	460.278815266917	501.118964168261	517.081266405313	365.403683297277	334.046050611922	326.808586924643	305.943297115527	231.742846014535	269.419229355987	104.67637425032	205.909533665091	203.364925004212	169.33993025451	149.636554086992	164.605816547665	156.575783474957	215.917501697102	255.504073696965	336.859289135562	287.445341907673	310.037620213496	224.273934562965	166.941716915238
Syria, Rural Damascus	363.122114867339	455.12507859364	170.936899859358	659.850405829592	747.086528558707	765.046567756483	487.746291613277	430.929124093994	411.7791873733	372.277011555428	261.817352774053	308.974101024092	135.310858019699	227.450372302417	224.016792557118	183.400287986142	126.066891736905	177.977506667056	170.184646004853	240.073297498994	290.35397451302	431.372336162489	340.345235427344	379.296291797361	250.019297627494	180.422476738223
Syria، Tartous	371.30966180589	244.205376463073	357.184705145861	140.234902854151	203.447982079837	180.396070757977	327.693683498772	354.633949789095	247.440247534166	389.264556454625	423.429161421691	430.3540905558	616.890383022356	420.156398110898	459.905388436301	433.155152692863	624.566862993839	525.269647895058	471.560696677834	141.046880956288	184.387590221504	144.830770007741	190.39734871074	158.705127125443	241.22169269083	175.803379573433
